# Supplementary material
Source: PubMed Central journal article supplement (PMC2954252)
Supplement: NIHMS230130-supplement-ESI.pdf [file NIHMS230130-supplement-ESI.pdf]

Electronic Supplementary Information (ESI)

**Kinetics of NF- $\kappa$ B Nucleocytoplasmic Transport Probed by Single-cell  
Screening without Imaging**

*Jun Wang, Bei Fei, Yihong Zhan, Robert L. Geahlen & Chang Lu\**

Correspondence should be addressed to C. L. ([changlu@vt.edu](mailto:changlu@vt.edu)).

## Supplementary Data

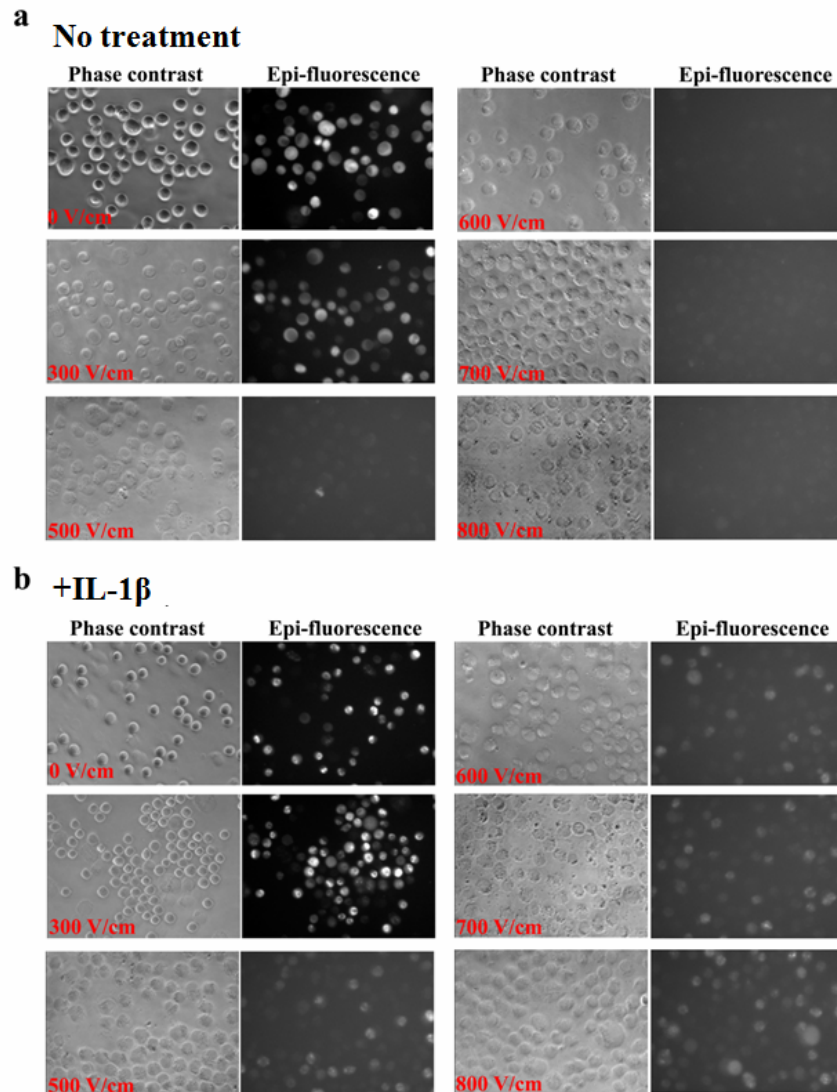

**Figure S1.** The phase contrast and epi-fluorescence images of NF $\kappa$ Bp65-GFP cells (a) without stimulation and (b) stimulated with 20 ng/ml IL-1 $\beta$  for 0.5 h at 37°C after electroporative flow cytometry screening under different field intensities and a field duration of 120 ms.

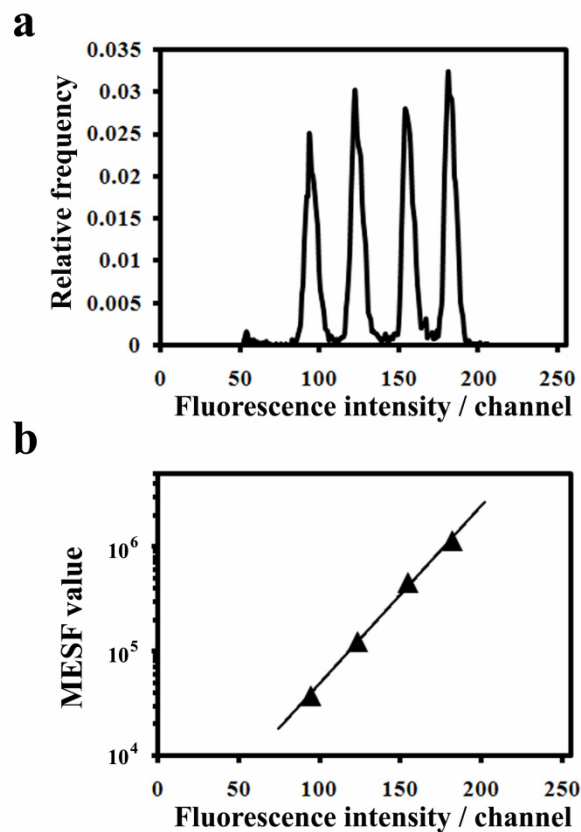

**Figure S2.** Calibration of the fluorescence signals. **(a)** The histograms of fluorescent beads with various predefined fluorescence intensity levels (high level Quantum FITC MESF Kits, Bangs Laboratories). **(b)** The working curve with the Molecules of Equivalent Soluble Fluorophores (MESF) values of the beads plotted against the peak channel numbers detected by our system ( $R^2=0.997$ ). The plot allows the conversion between the channel numbers detected by our system and the MESF values.

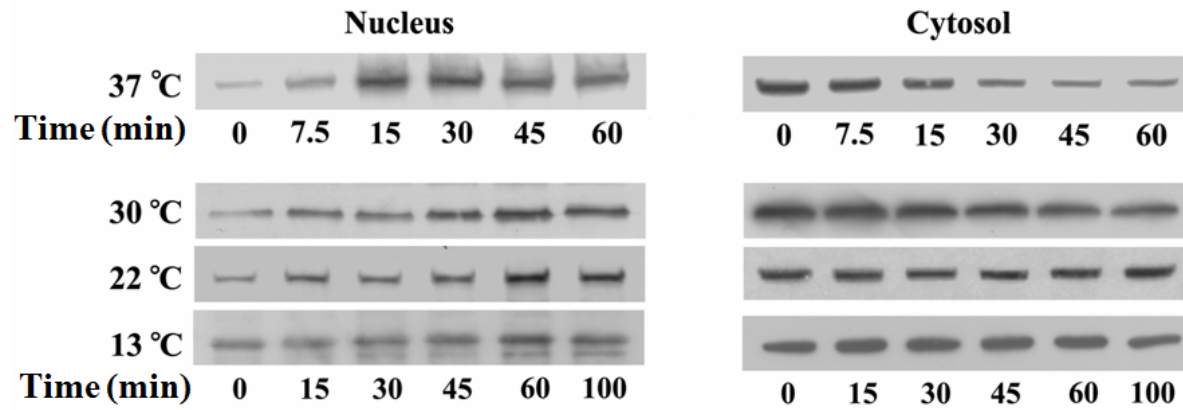

**Figure S3.** Subcellular fractionation/Western blotting results that indicate NF- $\kappa$ B amount in the nucleus and the cytosol after stimulation by IL-1 $\beta$  under different temperatures and after various stimulation times.
